# Supplementary material for: A carbon nanofiber/Ti3C2Tx/carboxymethyl cellulose composite-based highly sensitive, reversible, directionally controllable humidity actuator and generator via continuous track-inspired self-assembly
Source: Royal Society of Chemistry journal article supplement (doi:10.1039/d4ta04397a), 2024-01-01
Supplement: d4ta04397a1.pdf [file d4ta04397a1.pdf]

## Supplementary material

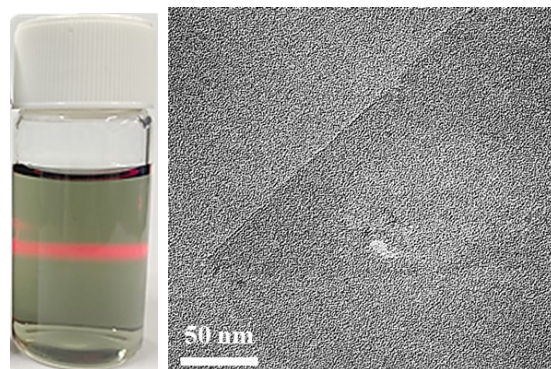

Fig. S1. Digital photograph and TEM image of MXene nanosheet. The TEM image shows the exfoliated single-layer MXene nanosheet with several hundred nanometers in lateral size.

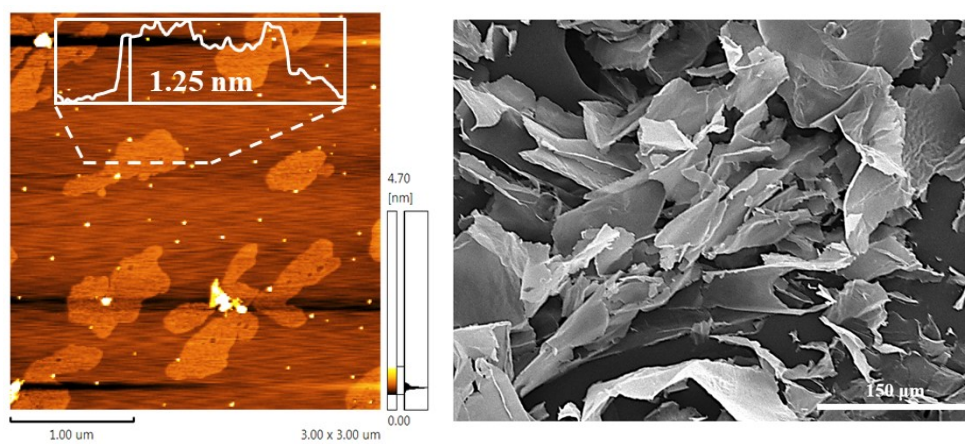

Fig. S2. AFM and SEM images of MXene nanosheet.

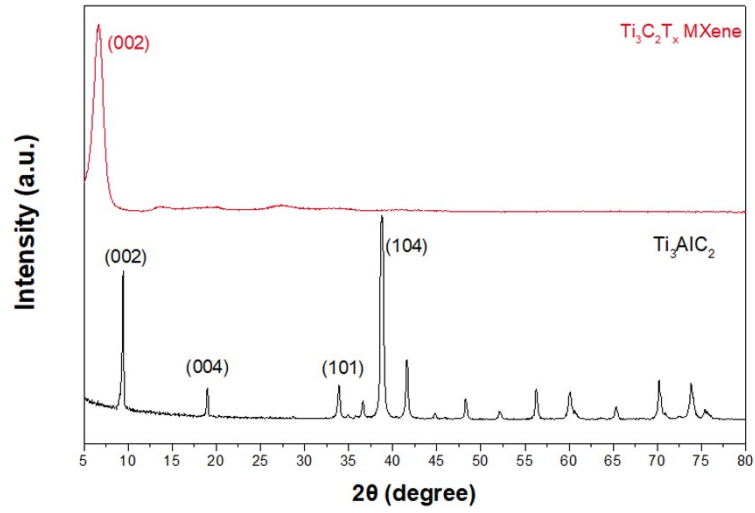

Fig. S3. XRD spectra of  $\text{Ti}_3\text{AlC}_2$  and  $\text{Ti}_3\text{C}_2\text{T}_x$  MXene.

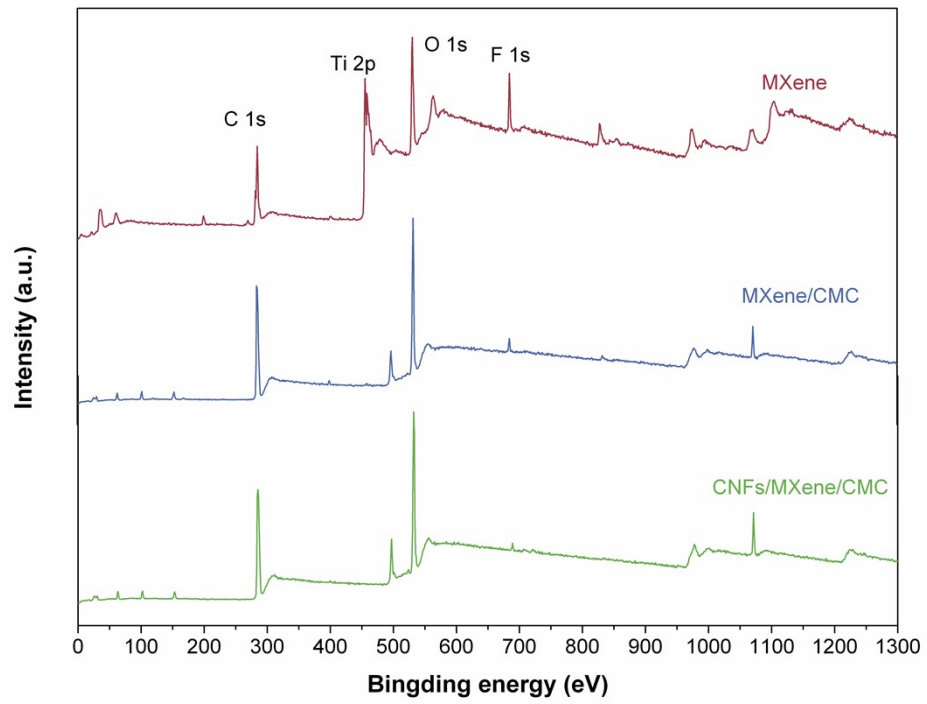

Fig. S4. XPS spectra of pure MXene, MXene/CMC, and CNFs/MXene/CMC.

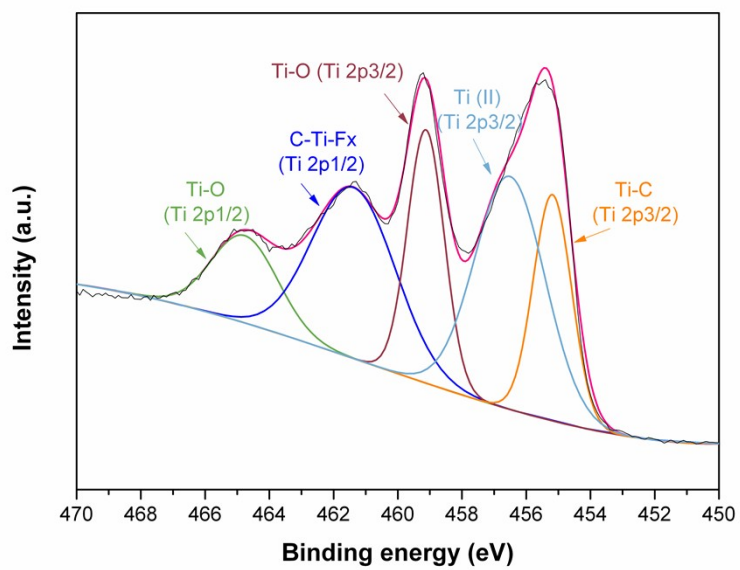

Fig. S5. Ti 2p XPS spectra of MXene.

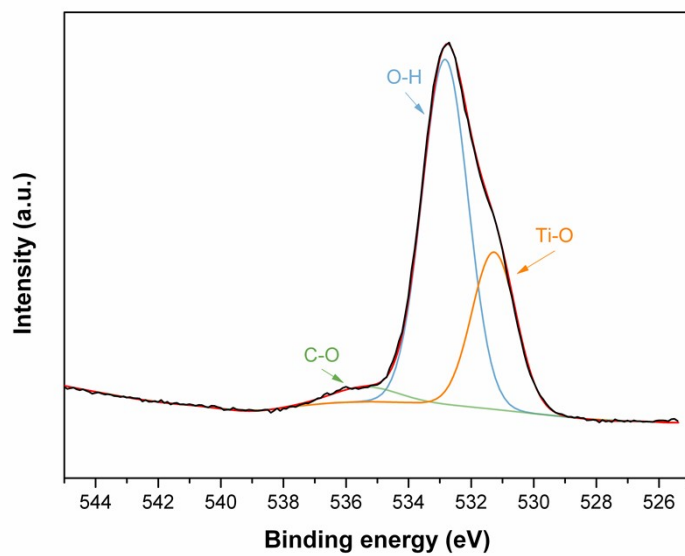

Fig. S6. O 1s XPS spectra of MXene

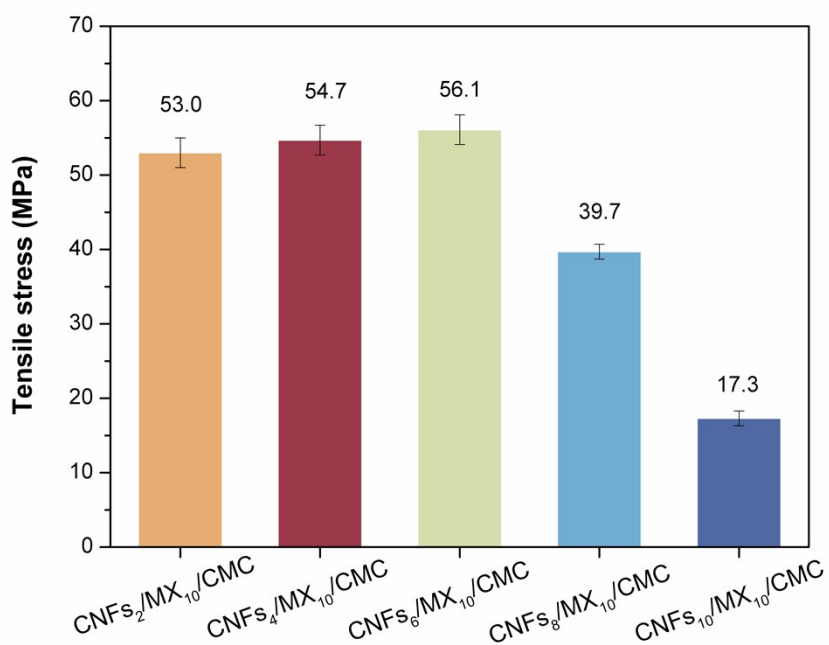

Fig. S7. Tensile stress of CNFs/MXene/CMC films containing 0, 2, 4, 6, 8 and 10 wt% CNFs.

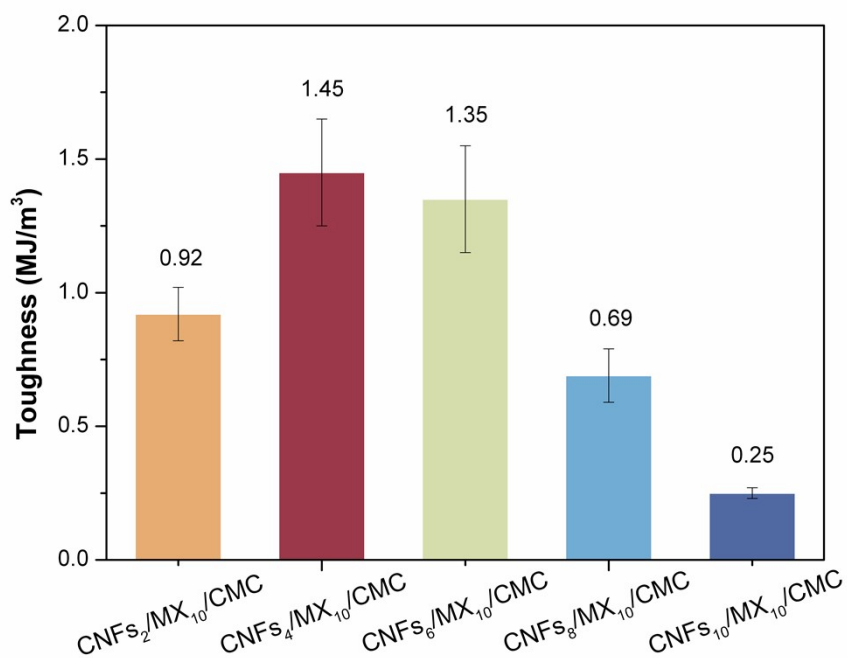

Fig. S8. Toughness of CNFs/MXene/CMC films containing 0, 2, 4, 6, 8 and 10 wt% CNFs.

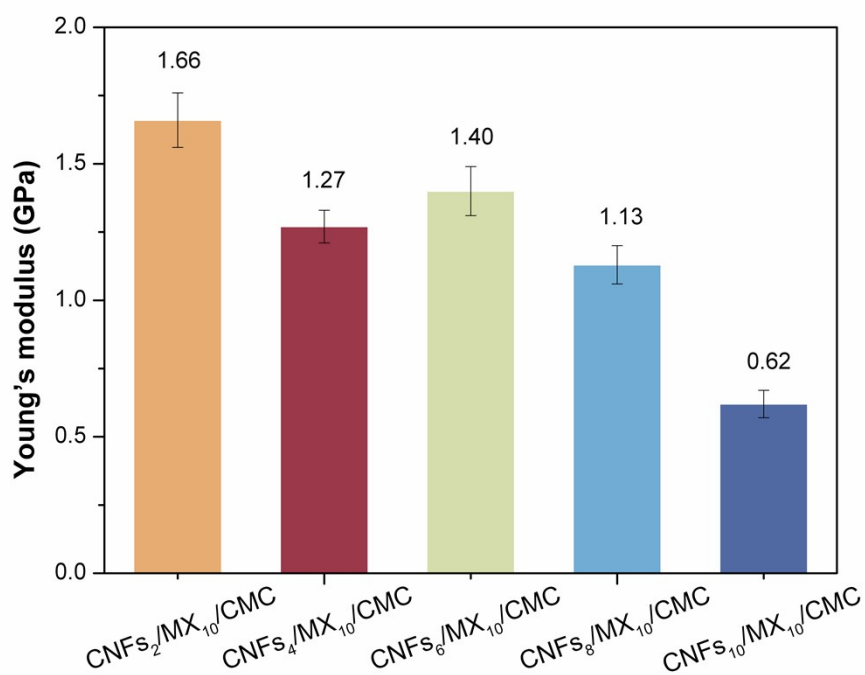

Fig. S9. Young's modulus of CNFs/MXene/CMC films containing 0, 2, 4, 6, 8 and 10 wt% CNFs.

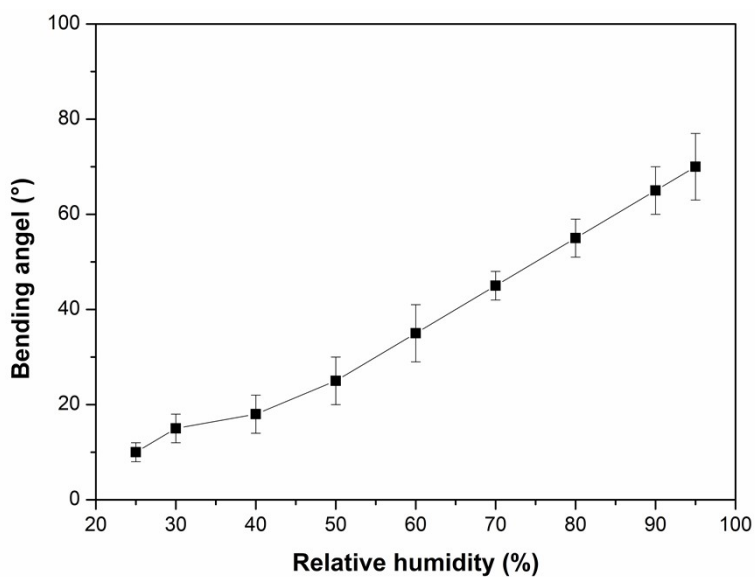

Fig. S10. The maximum bending angle of the pure MXene film at various relative humidity.

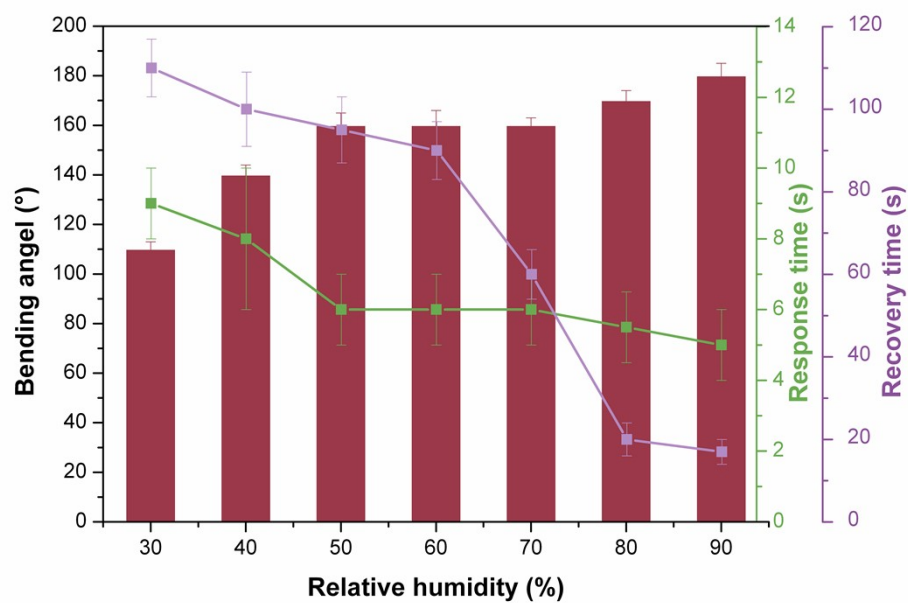

Fig. S11. Bending angles, response times and recovery times of MX<sub>10</sub>/CMC film actuator at different relative humidity

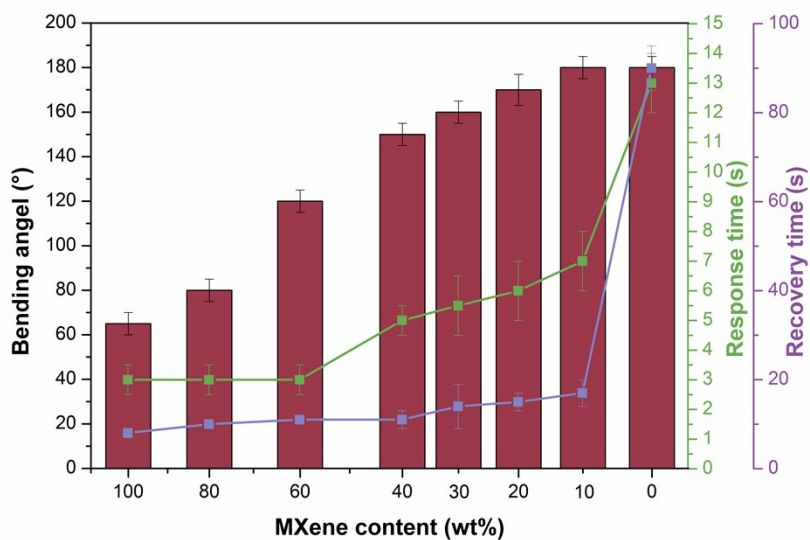

Fig. S12. Bending angles, response times and recovery times of MXene/CMC film actuators with different content of CMC at 95% relative humidity

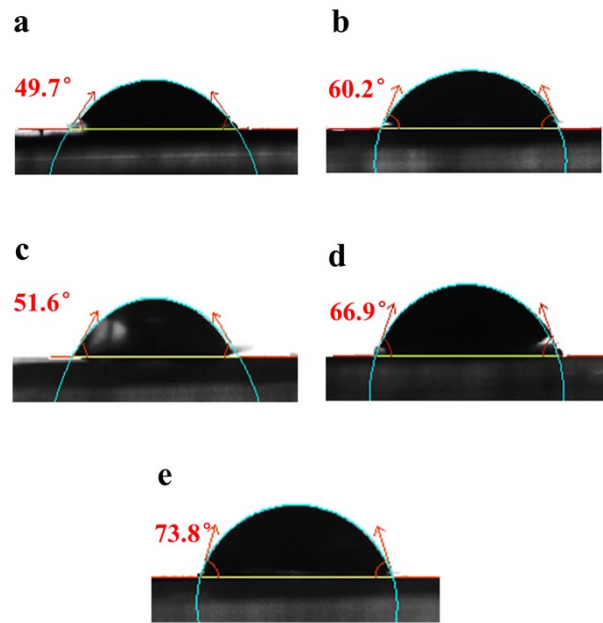

Fig. S13. Contact angle of different film (a) CMC, (b) MXene, (c) MX<sub>10</sub>/CMC, (d) CNFs<sub>6</sub>/MX<sub>10</sub>/CMC-top, and (e) CNFs<sub>6</sub>/MX<sub>10</sub>/CMC-bottom

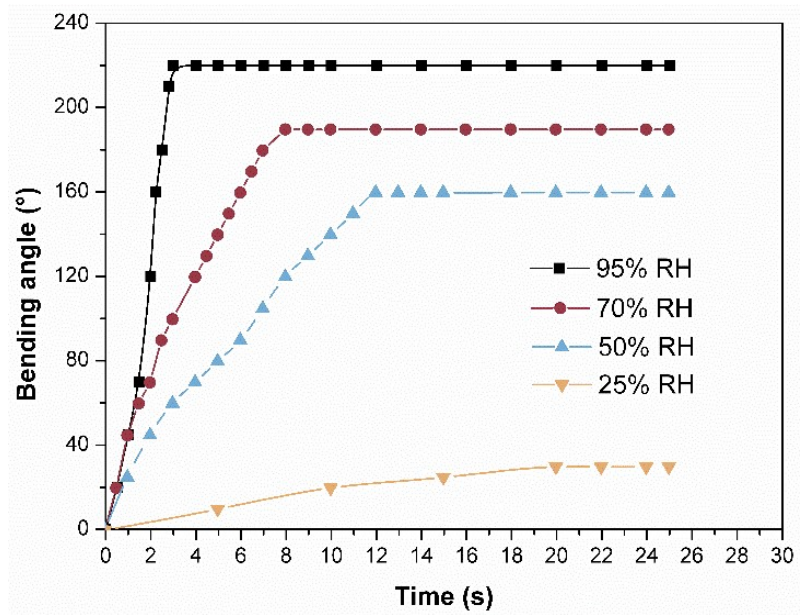

Fig. S14. The bending processes of the CNFs<sub>6</sub>/MX<sub>10</sub>/CMC composite film under different relative humidity



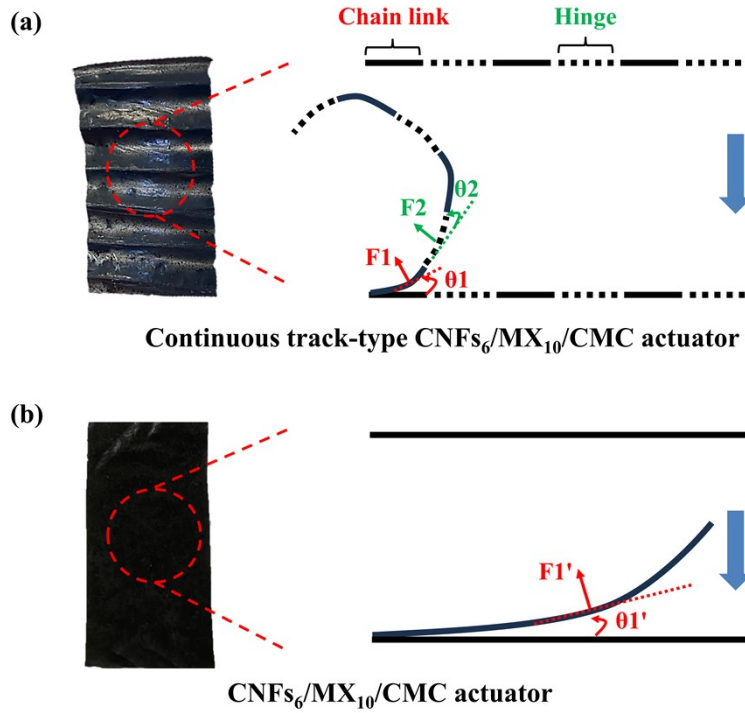

Fig. S15. Synchronous movement of bending angles of (a) continuous track-type and (b) flat CNFs<sub>6</sub>/MX<sub>10</sub>/CMC actuator.

The relationship between deformation and force can be written as Equation (1):<sup>1</sup>

$$L\varepsilon = F/k_{eq} \quad (1)$$

where  $L$  is the length,  $\varepsilon$  is the strain,  $F$  is the Von mises stress applied to the structure, and  $k_{eq}$  is the equivalent stiffness coefficient.

Based on the finite element simulation results, it is evident that due to the similar material compositions of the flat and continuous track-type (chain link section) CNFs<sub>6</sub>/MX<sub>10</sub>/CMC actuators, the Von Mises stresses generated by the humidity change are almost identical and are denoted as  $F1$  and  $F1'$  respectively. Additionally, the force on the hinge section of the continuous track-type film, which is not uniformly distributed due to its anisotropic structure, is denoted as  $F2$ . The bending angles of the corresponding deformations resulting from the stresses are denoted as  $\theta1$ ,  $\theta1'$ , and  $\theta2$ , respectively.

The bending angle of a continuous track-type CNFs<sub>6</sub>/MX<sub>10</sub>/CMC actuator is determined by the deformation of neighboring sections. For one unit cell in periodic structures, the position of the end of the continuous track-type CNFs<sub>6</sub>/MX<sub>10</sub>/CMC actuator in the coordinate system can be expressed as Equation (2):

$$\begin{cases} X=0; \\ Y=L_1\sin\theta_1 + L_2\sin(\theta_1 + \theta_2) + \dots + L_n\sin(\theta_1 + \theta_2 + \dots + \theta_n); \\ Z=L_1\cos\theta_1 + L_1\cos(\theta_1 + \theta_2) + \dots + L_n\cos(\theta_1 + \theta_2 + \dots + \theta_n). \end{cases} \quad (2)$$

The position of the end of a flat CNFs<sub>6</sub>/MX<sub>10</sub>/CMC actuator in the coordinate system can be expressed as Equation (3):

$$\begin{cases} X'=0; \\ Y'=L\sin\theta_1'; \\ Z'=L\cos\theta_1', \end{cases} \quad (3)$$

where  $L$  is the length,  $\theta$  is the bending angle.

Based on the results of finite element simulations and position calculations in the coordinate system, the continuous track-type actuator, owing to its distinctive structure of anisotropic film with periodic structures, exhibits a significantly larger bending angle compared to the flat one.

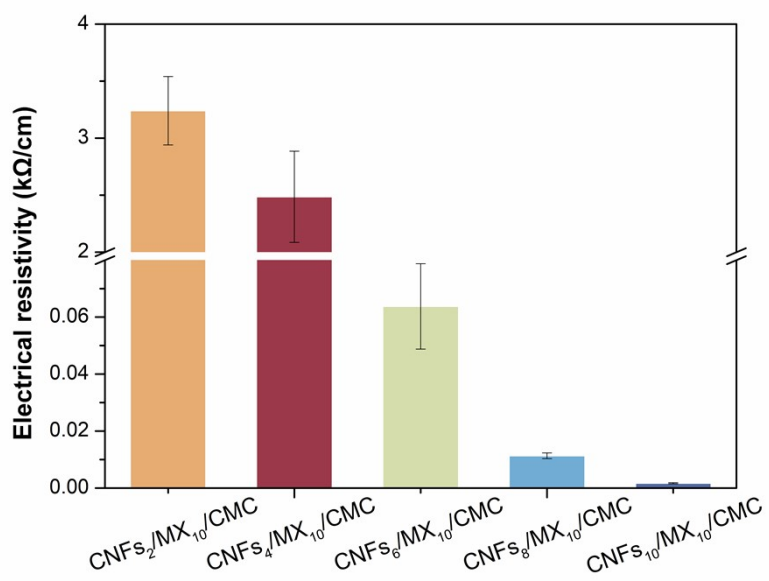

Fig. S16. Electrical resistivities of the CNFs/MX<sub>10</sub>/CMC composite film with different content of CNFs.

Table S1. The mechanical properties of films

| Sample                                    | Tensile strength<br>(MPa) | Strain<br>breaking (%) | Toughness<br>(MJ/m <sup>3</sup> ) | Young's modulus<br>(GPa) |
|-------------------------------------------|---------------------------|------------------------|-----------------------------------|--------------------------|
| MXene                                     | 12.7±1.6                  | 1.03± 0.05             | 0.050±0.003                       | 1.3±0.2                  |
| CMC                                       | 93.3±2.1                  | 7.34±0.06              | 4.49±0.68                         | 1.28±0.1                 |
| MX <sub>10</sub> /CMC                     | 128.6±10.1                | 5.61±0.08              | 4.20±0.63                         | 2.30±0.4                 |
| MX <sub>20</sub> /CMC                     | 105.7±5.8                 | 4.57±0.04              | 2.49±0.32                         | 2.23±0.3                 |
| MX <sub>40</sub> /CMC                     | 68.4±3.6                  | 2.90±0.06              | 1.01±0.02                         | 2.10±0.3                 |
| MX <sub>60</sub> /CMC                     | 29.1±1.9                  | 2.42±0.03              | 0.23±0.01                         | 1.21±0.1                 |
| CNFs <sub>2</sub> /MX <sub>10</sub> /CMC  | 53.0±2.3                  | 3.22±0.07              | 0.92±0.12                         | 1.66±0.1                 |
| CNFs <sub>4</sub> /MX <sub>10</sub> /CMC  | 54.7±2.1                  | 4.31±0.08              | 1.45±0.19                         | 1.27±0.06                |
| CNFs <sub>6</sub> /MX <sub>10</sub> /CMC  | 56.1±1.9                  | 4.14±0.08              | 1.35±0.18                         | 1.4±0.09                 |
| CNFs <sub>8</sub> /MX <sub>10</sub> /CMC  | 39.7±1.4                  | 3.53±0.04              | 0.69±0.14                         | 1.13±0.07                |
| CNFs <sub>10</sub> /MX <sub>10</sub> /CMC | 17.3±1.2                  | 2.84±0.03              | 0.25±0.02                         | 0.62±0.05                |

Table S2. Comparison of MXene-based humidity actuators

| Materials                                              | Relative humidity difference (%) | Bending angle (°) | Response time/Recovery time (s) | Reference |
|--------------------------------------------------------|----------------------------------|-------------------|---------------------------------|-----------|
| GO/MXene                                               | 40-70                            | -100-245          | 20/20                           | 2         |
| MXene/CNF/PDA/BOPP                                     | 40-90                            | 0-180             | 28/28                           | 3         |
| PDMM/BCNF                                              | $\Delta$ 40                      | 176               | 1.6/3.8                         | 4         |
| MXene-graphene oxide film                              | 40-90                            | 160               | 5/19                            | 5         |
| Polydopamine-treated reduced graphene oxide/MXene film | $\Delta$ 45                      | 148               | 1/3                             | 6         |
| MXene/cellulose/PSSA composite membrane                | 20-97                            | 28-130            | 15/20                           | 7         |
| CMC/MXene/Al <sup>3+</sup> composite film              | $\Delta$ 20- $\Delta$ 80         | 180               | 2/2.3                           | 8         |
| BC/GO/MXene composite film                             | $\Delta$ 50                      | 116               | 4/4                             | 9         |
| Continuous track-type CNFs/MXene/CMC                   | 20-95                            | 0-360             | 1.2/4.9                         | This work |

GO: graphene oxide; CNF: cellulose nanofibrils; PDA: p-Phenylenediamine; BOPP: bidirectional oriented polypropylene; PDMM/BCNF: Polydopamine modified MXene/bacterial cellulose nanofiber; PSSA: polystyrene sulfonic acid; BC: Bacterial cellulose

## References

- 1 Y. Lv, Q. Li, J. Shi, Z. Qin, Q. Lei, B. Zhao, L. Zhu and K. Pan, *ACS Appl. Mater. Interfaces*, 2022, **14**, 12434-12441.
- 2 L. Li, S. Zhao, X. J. Luo, H. B. Zhang and Z. Z. Yu, *Carbon*, 2021, **175**, 594-602.
- 3 J. Cao, Z. Zhou, Q. Song, K. Chen, G. Su, T. Zhou, X. Zhang, *ACS nano*, 2020, **14**, 7055-7065.
- 4 L. Yang, J. Cui, L. Zhang, X. Xu, X. Chen and D. Sun, *Adv. Funct. Mater.*, 2021, **31**, 2101378.
- 5 G. Jia, A. Zheng, X. Wang, L. Zhang, L. Li, C. Li and L. Cao, *Sensor. Actuat. B: Chem.*, 2021, **346**, 130507.
- 6 L. Yang, L. Zhang, J. Cui and D. Sun, *J. Mater. Chem. A*, 2022, **10**, 15785-15793.
- 7 P. Li, N. Su, Z. Wang and J. Qiu, *ACS nano*, 2021, **15**, 16811-16818.
- 8 J. Wei, S. Jia, C. Ma, J. Guan, C. Yan, L. Zhao and Z. Shao, *Chem. Eng. J.*, 2023, **451**, 138565.
- 9 Y. Ge, J. Zeng, B. Hu, D. Y. Yang, Y. and Shao, H. Lu, *Giant*, 2022, **11**, 100107.
